# Supplementary material for: Autocrine inhibition by a glutamate-gated chloride channel mediates presynaptic homeostatic depression
Source: PubMed Central journal article supplement — Sci Adv. 2021 Dec 1;7(49):eabj1215. doi: 10.1126/sciadv.abj1215 (PMC8635443; doi:10.1126/sciadv.abj1215), 2021-12-01
Supplement: sciadv.abj1215_sm.pdf [file sciadv.abj1215_sm.pdf]

Supplementary Materials for  
**Autocrine inhibition by a glutamate-gated chloride channel mediates  
presynaptic homeostatic depression**

Xiling Li, Chun Chien, Yifu Han, Zihan Sun, Xun Chen, Dion Dickman\*

\*Corresponding author. Email: dickman@usc.edu

Published 1 December 2021, *Sci. Adv.* 7, eabj1215 (2021)  
DOI: 10.1126/sciadv.abj1215

**This PDF file includes:**

Figs. S1 to S5  
Tables S1 to S3

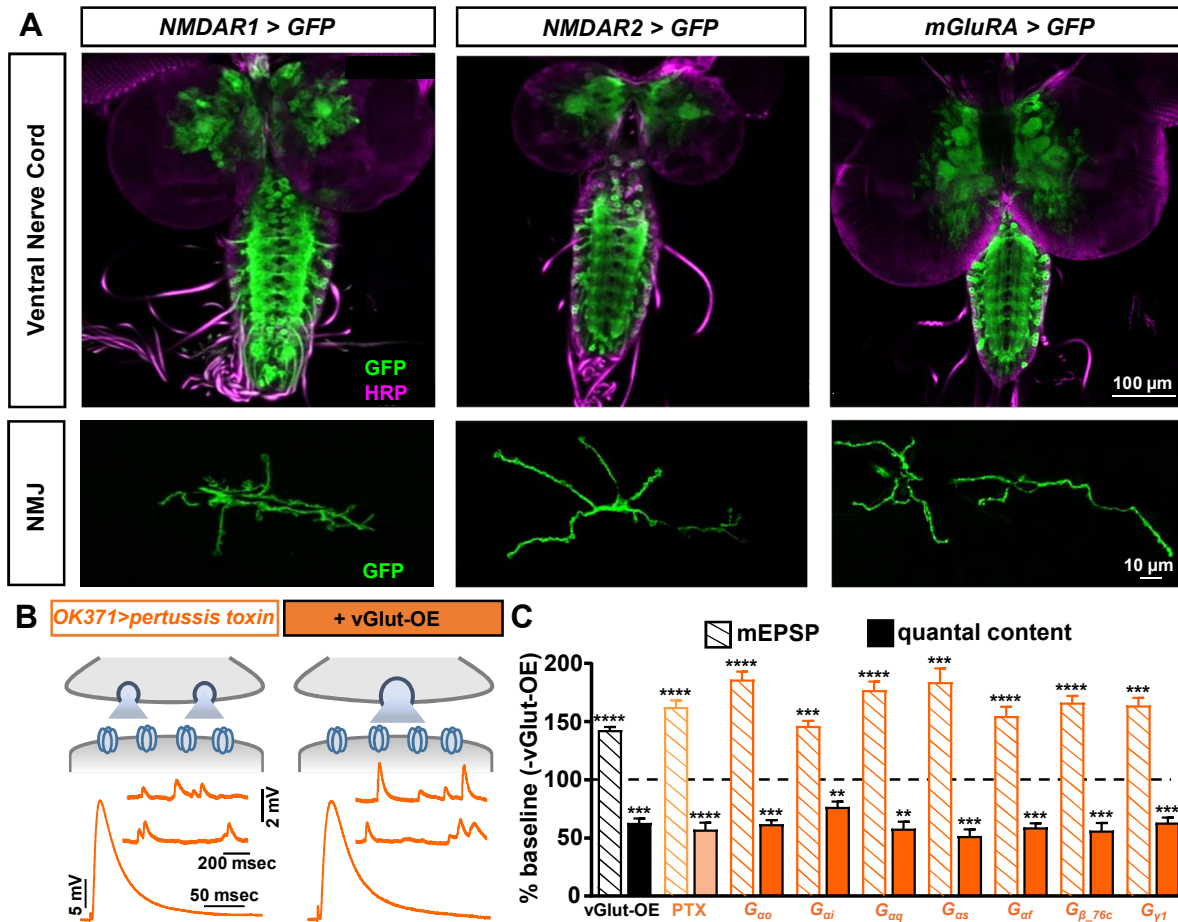

**Supplemental Figure 1: Additional screening of metabotropic signaling finds no evidence for roles in PHD. (A)** CNS and NMJ single plane confocal images of membrane anchored GFP (CD4::tdGFP; green) and the neuronal membrane marker HRP (magenta) in *NMDAR1>GFP* (*w;NMDAR1-T2A-Gal4/UAS-CD4-td-GFP*), *NMDAR2>GFP* (*NMDAR2-T2A-Gal4;UAS-CD4-td-GFP/+*), and *mGluRA>GFP* (*w; UAS-CD4-td-GFP/+; mGluRA-T2A-Gal4/+*). **(B)** Schematics and representative traces of electrophysiological recordings of pertussis toxin driven in motor neurons (*OK371>pertussis toxin; w;OK371-Gal4/+;UAS-pertussis toxin/+*) at baseline and following *vGlut* overexpression (+*vGlut-OE*: *w;OK371-Gal4/UAS-vGlut;UAS-pertussis toxin/+*). Pertussis toxin disrupts *G<sub>ai</sub>* and *G<sub>oo</sub>* signaling. **(C)** Quantification of mEPSP and quantal content values normalized to baseline values (-*vGlut-OE*;  $n \geq 8$  for all genotypes in this analysis) of all RNAi lines screened targeting G protein signaling. Increased mEPSP amplitudes are observed at all NMJs following *vGlut* overexpression, while a reduction in presynaptic release maintains EPSP amplitude at baseline levels due to PHD expression. Asterisks indicate statistical significance using a Student's t-test: (\*\*)  $p < 0.01$ ; (\*\*\*)  $p < 0.001$ ; (\*\*\*\*)  $p < 0.0001$ . Error bars indicate  $\pm$ SEM. n values indicate biologically independent cells. Additional information and absolute values for normalized data can be found in Table S1.

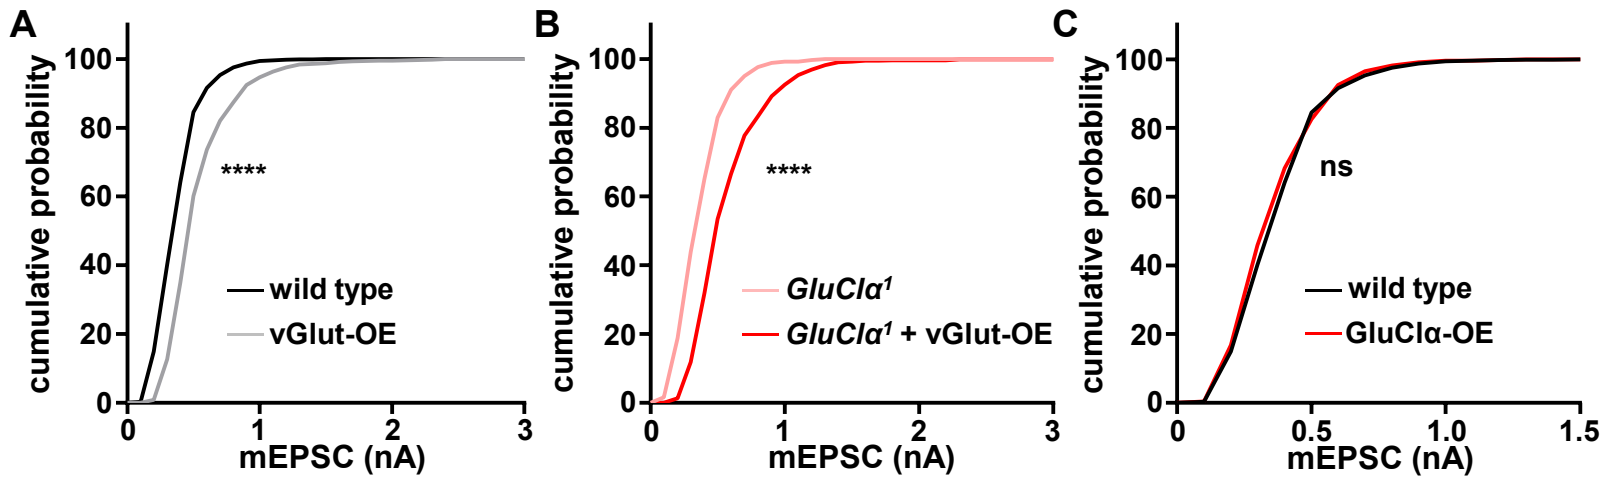

**Supplemental Figure 2: vGlut-OE increases miniature amplitude in wild type and *GluClα* mutants.** (A) Cumulative probability histogram of mEPSC amplitudes from wild type ( $w^{1118}$ ,  $n=908$ ) and vGlut-OE ( $w;OK371-Gal4/UAS-vGlut$ ,  $n=1317$ ) larvae. (B) Cumulative probability histogram of mEPSC amplitudes from *GluClα*<sup>1</sup> (*GluClα*<sup>1</sup>,  $n=867$ ) and *GluClα*<sup>1</sup>+vGlut-OE ( $w;OK371-Gal4/UAS-vGlut;GluClα<sup>1</sup>,  $n=961$ ) larvae. In both A and B, vGlut-OE significantly enhances the distribution of mEPSC amplitude, as expected. (C) Cumulative probability histogram of mEPSC amplitudes from wild type ( $w^{1118}$ ,  $n=894$ ) and *GluClα*<sup>1</sup>-OE ( $w;OK371-Gal4/UAS-GluClα$ ,  $n=488$ ) larvae. *GluClα* overexpression has no impact on miniature amplitude. Asterisks indicate statistical significance using a Kolmogorov–Smirnov test: (****)  $p<0.0001$ , (ns)  $p>0.05$ . n values indicate independent miniature events.$

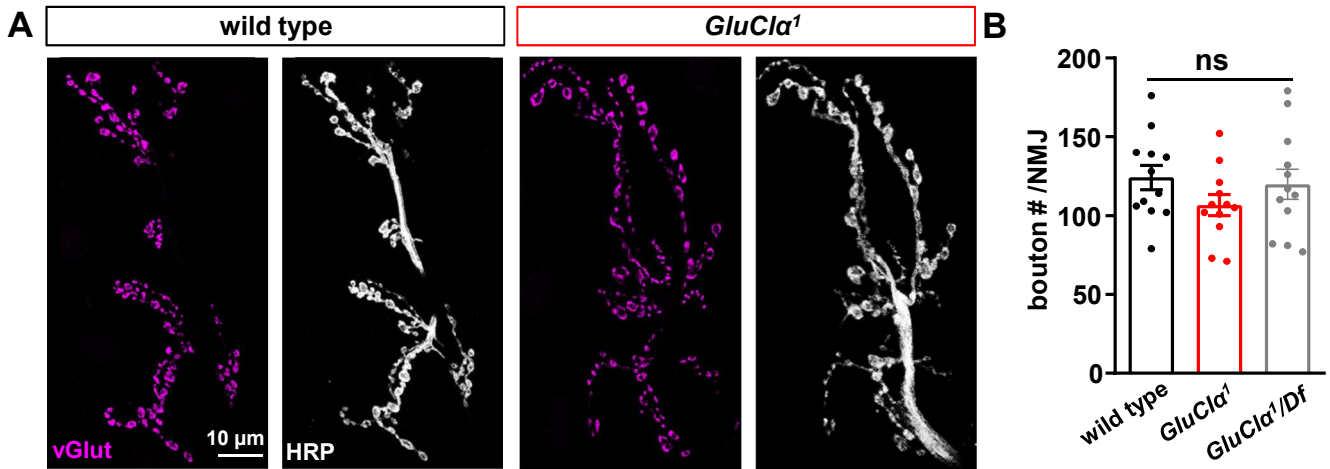

**Supplemental Figure 3: *GluCla* mutants exhibit normal synaptic growth.** (A) Representative images of muscle 6 and 7 NMJs immunostained with antibodies against the neuronal membrane marker HRP (white) and the glutamate transporter vGlut (magenta) for wild type and *GluCla*<sup>1</sup>. (B) Quantification of bouton number per NMJ in the indicated genotypes. No significant difference in the bouton numbers/NMJ were observed between wild type and *GluCla* mutants. Asterisks indicate statistical significance using a one-way ANOVA followed by multiple comparison: (ns)  $p > 0.05$ . Error bars indicate  $\pm$ SEM. n values indicate biologically independent cells. Additional information can be found in Table S2.

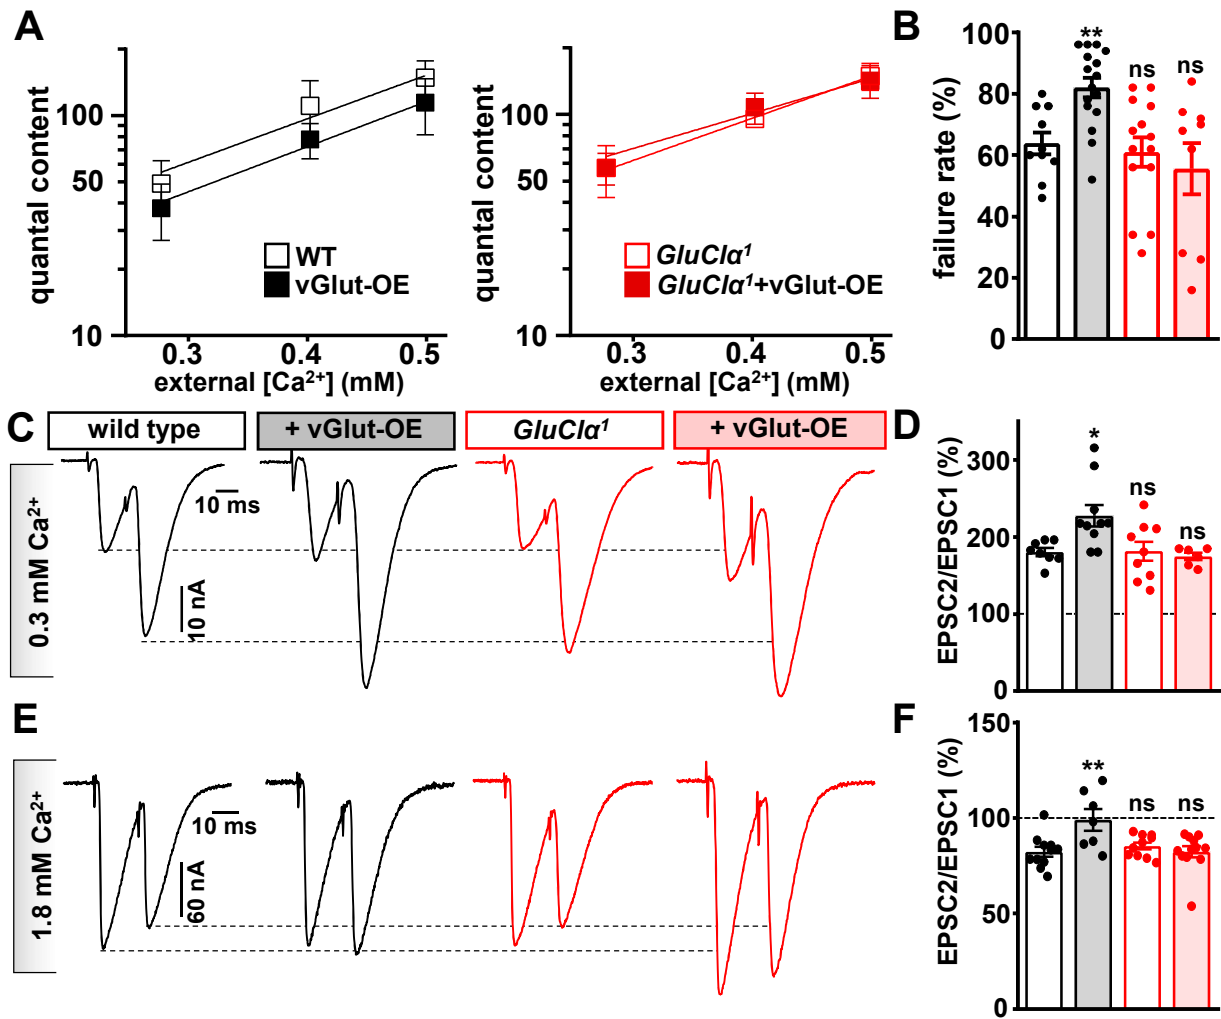

**Supplemental Figure 4: Characterization of  $Ca^{2+}$  cooperativity, failure analysis and short-term plasticity in *GluCla* mutants.** (A) Quantal content plotted as a function of extracellular  $Ca^{2+}$  concentration on a log/log scale, with best fit lines shown, for wild type and vGlut-OE and also for *GluCla*<sup>1</sup> and *GluCla*<sup>1</sup>+vGlut-OE. No significant difference in the slopes were observed in either graph (Table S2). (B) Failure analysis reveals a significant increase in failure rate in vGlut-OE, as expected, due to PHD expression. This increase in failure rate fails to be observed in *GluCla* mutants following vGlut overexpression, consistent with a failure to express PHD. (C) Representative EPSC traces at 0.3 mM extracellular  $Ca^{2+}$  at NMJs of the indicated genotypes stimulated with an interstimulus interval of 16.7 msec. Enhanced paired-pulse facilitation (PPF) was observed at vGlut-OE NMJs, consistent with a decrease in release probability, while this enhancement was not observed in *GluCla*<sup>1</sup>+vGlut-OE. (D) Quantification of the paired-pulse ratio (EPSC2/EPSC1) in the indicated genotypes (wild type n=8, +vGlut-OE n=10; *GluCla*<sup>1</sup> n=9, +vGlut n=6). (E) Representative EPSC traces at 1.8 mM extracellular  $Ca^{2+}$  at NMJs of the indicated genotypes stimulated as in (C). No paired-pulse depression (PPD) was observed in vGlut-OE, as expected due to reduced release probability. However, reduced PPD was observed *GluCla*<sup>1</sup>+vGlut-OE, consistent with a failure to express PHD. (F) Quantification of the paired-pulse ratio (EPSC2/EPSC1) in the indicated genotypes (wild type n=11, +vGlut-OE n=7; *GluCla*<sup>1</sup> n=10, +vGlut-OE n=12). Asterisks indicate statistical significance using a one-way ANOVA followed by multiple comparison: (\*) p<0.05; (\*\*) p<0.01; (ns) p>0.05. Error bars indicate  $\pm$ SEM. n values indicate biologically independent cells. Additional statistical information and absolute values for normalized data can be found in Table S2.

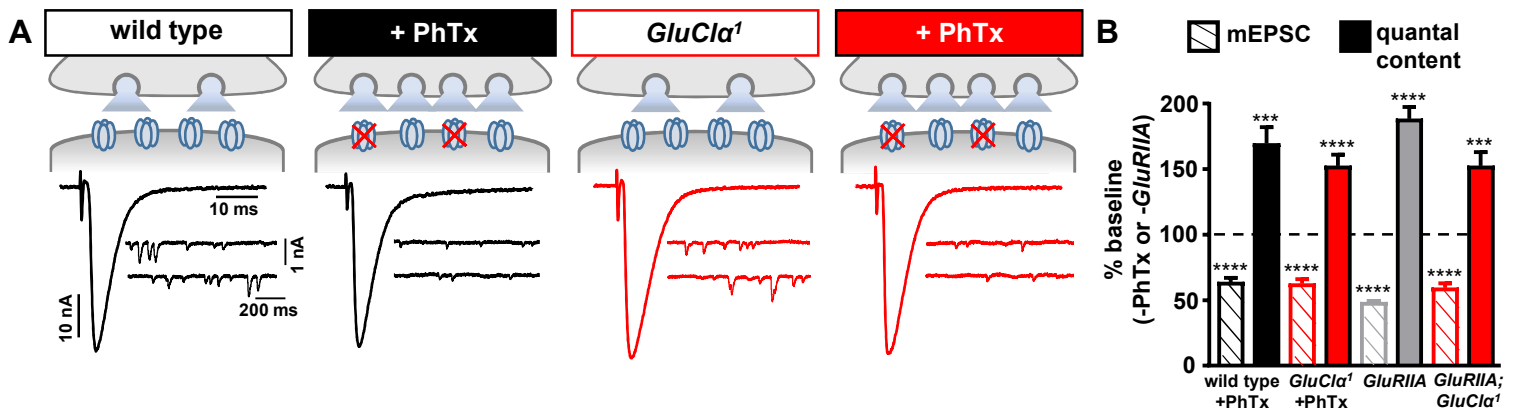

**Supplemental Figure 5: *GluCla* is dispensable for PHP expression.** (A) Schematics and representative traces of recordings from wild type and *GluCla*<sup>1</sup> mutant NMJs at baseline and after incubation with the postsynaptic GluR antagonist philanthotoxin-433 (PhTx). mEPSC amplitudes are diminished following PhTx application in both wild-type and *GluCla*<sup>1</sup> NMJs, as expected, while EPSC amplitudes remain similar to baseline values due to a retrograde enhancement of presynaptic release. Robust PHP expression is observed in both wild type and *GluCla*<sup>1</sup> mutants. (B) Quantification of mEPSC and quantal content values normalized to baseline values in the indicated genotypes (wild type n=11, +PhTx n=9; *GluCla*<sup>1</sup> n=12, *GluCla*<sup>1</sup>+PhTx n=8; *GluRIIA*<sup>sp16</sup> n=6; *GluCla*<sup>1</sup>+*GluRIIA*<sup>sp16</sup> n=13). Asterisks indicate statistical significance using a Student's t-test: (\*\*\*) p<0.001; (\*\*\*\*) p<0.0001. Error bars indicate ±SEM. n values indicate biologically independent cells. Additional statistical information and absolute values for normalized data can be found in Table S2.

**Supplementary Table 1: Genes screened for defects in PHD expression and summarized results.** The gene information, source, perturbation, electrophysiological values, and number of recordings (n) are shown for each gene screened.

| GluR mutations                              |                                                       |                |                                                |             |                                                                   |          |        |        |        |    |
|---------------------------------------------|-------------------------------------------------------|----------------|------------------------------------------------|-------------|-------------------------------------------------------------------|----------|--------|--------|--------|----|
| CG #                                        | GluR Gene                                             | Abbrev.        | Allele (s)                                     | Source      | Disruption Type                                                   | vGlut-OE | mEPSP  | EPSP   | QC     | n  |
|                                             | Control                                               |                | w <sup>1118</sup>                              |             | wild type                                                         | -        | 0.974  | 26.176 | 27.689 | 14 |
|                                             | Control                                               |                | w <sup>1118</sup>                              |             | wild type                                                         | +        | 1.386  | 23.724 | 17.288 | 15 |
| 3822                                        | Kainate-type ionotropic glutamate receptor subunit 1D | KaiR1D         | DKaiR1D <sup>1</sup>                           | BL18663     | transposon insertion in exonic region                             | -        | 1.001  | 17.026 | 17.005 | 9  |
|                                             |                                                       |                |                                                |             |                                                                   | +        | 1.528  | 16.622 | 10.882 | 10 |
| 5621                                        | Kainate-type ionotropic glutamate receptor subunit 1C | KaiR1C         | KaiR1C <sup>M895324</sup>                      | BL24332     | transposon insertion in exonic region                             | -        | 0.998  | 21.709 | 21.753 | 9  |
|                                             |                                                       |                |                                                |             |                                                                   | +        | 1.537  | 23.924 | 15.792 | 12 |
| 2902                                        | NMDA receptor 1                                       | NMDAR1         | NMDAR1 <sup>XC1</sup> /NMDAR1 <sup>XC3</sup>   | this study  | CRISPR/Cas-9 mutagenesis                                          | -        | 0.912  | 22.344 | 26.329 | 9  |
|                                             |                                                       |                |                                                |             |                                                                   | +        | 1.389  | 22.659 | 17.031 | 10 |
| 33513                                       | NMDA receptor 2                                       | NMDAR2         | NMDAR2 <sup>Y107</sup> /γ                      | this study  | CRISPR/Cas-9 mutagenesis                                          | -        | 1.115  | 27.713 | 24.855 | 7  |
|                                             |                                                       |                |                                                |             |                                                                   | +        | 1.566  | 26.184 | 16.938 | 8  |
|                                             |                                                       | NMDAR2         | NMDAR2 <sup>Y107</sup> /NMDAR2 <sup>Y109</sup> | this study  | CRISPR/Cas-9 mutagenesis                                          | -        | 1.002  | 28.941 | 28.939 | 8  |
|                                             |                                                       |                |                                                |             |                                                                   | +        | 1.31   | 27.472 | 21.213 | 8  |
| 11144                                       | metabotropic Glutamate Receptor                       | mGluRA         | mGluRA <sup>A12b</sup>                         | (23)        | imprecise P element excision of 5' UTR and coding region          | -        | 0.944  | 23.542 | 25.292 | 9  |
|                                             |                                                       |                |                                                |             |                                                                   | +        | 1.348  | 24.187 | 17.819 | 10 |
|                                             |                                                       |                | mGluRA <sup>N86701</sup>                       | DGRC105323  | transposon insertion in exonic region                             | -        | 0.878  | 29.736 | 33.848 | 8  |
|                                             |                                                       |                |                                                |             |                                                                   | +        | 1.498  | 28.46  | 18.997 | 8  |
| 7535                                        | GluClα                                                | GluClα         | GluClα <sup>M20290(1)</sup>                    | BL38025     | transposon insertion in intronic region                           | -        | 0.947  | 27.119 | 28.642 | 8  |
|                                             |                                                       |                |                                                |             |                                                                   | +        | 1.42   | 41.117 | 29.781 | 15 |
| GluR RNAi lines                             |                                                       |                |                                                |             |                                                                   |          |        |        |        |    |
| CG #                                        | GluR Gene                                             | Abb.           | RNAi                                           | Source      | Genotype                                                          | vGlut-OE | mEPSP  | EPSP   | QC     | n  |
| 11155                                       | CG11155                                               | CG11155        | VDRC                                           | VDRC.v11963 | OK371-Gal4/+;UAS-RNAi <sup>GD4652/+</sup>                         | -        | 0.886  | 26.588 | 29.993 | 10 |
|                                             |                                                       |                |                                                |             | OK371-Gal4/UAS- $\rightarrow$ Glut;UAS-RNAi <sup>GD4652/+</sup>   | +        | 1.362  | 18.921 | 13.896 | 8  |
| 8681                                        | clumsy                                                | clumsy         | VALIUM10                                       | BL28351     | OK371-Gal4/+;UAS-TRiP <sup>FD2987/+</sup>                         | -        | 0.915  | 24.567 | 26.849 | 7  |
|                                             |                                                       |                |                                                |             | OK371-Gal4/UAS- $\rightarrow$ Glut;UAS-TRiP <sup>FD2987/+</sup>   | +        | 1.4363 | 22.679 | 15.791 | 6  |
| 5621                                        | Kainate-type ionotropic glutamate receptor subunit 1C | KaiR1C         | VALIUM10                                       | BL25822     | OK371-Gal4/+;UAS-TRiP <sup>FD1840/+</sup>                         | -        | 1.027  | 22.155 | 21.582 | 6  |
|                                             |                                                       |                |                                                |             | OK371-Gal4/UAS- $\rightarrow$ Glut;UAS-TRiP <sup>FD1840/+</sup>   | +        | 1.658  | 16.831 | 10.391 | 6  |
| 9935                                        | Eye-enriched kainate receptor                         | Ekar           | VALIUM10                                       | BL28506     | OK371-Gal4/+;UAS-TRiP <sup>FD1126/+</sup>                         | -        | 1.078  | 24.51  | 23.967 | 7  |
|                                             |                                                       |                |                                                |             | OK371-Gal4/UAS- $\rightarrow$ Glut;UAS-TRiP <sup>FD1126/+</sup>   | +        | 1.452  | 14.681 | 10.394 | 9  |
| 8442                                        | Glutamate receptor IA                                 | GluRIA         | VALIUM10                                       | BL27521     | OK371-Gal4/+;UAS-TRiP <sup>FD2071/+</sup>                         | -        | 0.927  | 26.847 | 29.489 | 7  |
|                                             |                                                       |                |                                                |             | OK371-Gal4/UAS- $\rightarrow$ Glut;UAS-TRiP <sup>FD2071/+</sup>   | +        | 1.301  | 25.439 | 19.985 | 7  |
| 43743                                       | Glutamate receptor IB                                 | GluRIB         | VALIUM10                                       | BL27673     | OK371-Gal4/+;UAS-TRiP <sup>FD2752/+</sup>                         | -        | 1.049  | 24.278 | 23.284 | 6  |
|                                             |                                                       |                |                                                |             | OK371-Gal4/UAS- $\rightarrow$ Glut;UAS-TRiP <sup>FD2752/+</sup>   | +        | 1.564  | 19.649 | 12.811 | 11 |
| 2902                                        | NMDA receptor 1                                       | NMDAR1         | VALIUM10                                       | BL25941     | OK371-Gal4/+;UAS-TRiP <sup>FD1961/+</sup>                         | -        | 0.853  | 26.629 | 31.497 | 8  |
|                                             |                                                       |                |                                                |             | OK371-Gal4/UAS- $\rightarrow$ Glut;UAS-TRiP <sup>FD1961/+</sup>   | +        | 1.218  | 18.11  | 14.867 | 11 |
| 33513                                       | NMDA receptor 2                                       | NMDAR2         | VALIUM10                                       | BL26019     | OK371-Gal4/+;UAS-TRiP <sup>FD2044/+</sup>                         | -        | 1.021  | 31.386 | 31.573 | 18 |
|                                             |                                                       |                |                                                |             | OK371-Gal4/UAS- $\rightarrow$ Glut;UAS-TRiP <sup>FD2044/+</sup>   | +        | 1.273  | 29.767 | 23.921 | 16 |
|                                             |                                                       | NMDAR2         | VALIUM20                                       | BL40846     | OK371-Gal4/+;UAS-TRiP <sup>DM92012/+</sup>                        | -        | 1.017  | 25.099 | 24.688 | 7  |
|                                             |                                                       |                |                                                |             | OK371-Gal4/UAS- $\rightarrow$ Glut;UAS-TRiP <sup>DM92012/+</sup>  | +        | 1.291  | 20.798 | 16.411 | 8  |
| RNAi lines targeting metabotropic signaling |                                                       |                |                                                |             |                                                                   |          |        |        |        |    |
| CG #                                        | Gene                                                  | Abb.           | disruption type                                | Source      | Genotype                                                          | vGlut-OE | mEPSP  | EPSP   | QC     | n  |
|                                             | Control                                               |                | w <sup>1118</sup>                              |             | wild type                                                         | -        | 0.896  | 26.553 | 30.023 | 11 |
| 10060                                       | G protein $\alpha$ i subunit                          | Gai            | VALIUM1                                        | BL31133     | OK371-Gal4/UAS- $\rightarrow$ Glut;UAS-RNAi <sup>FD1608/+</sup>   | +        | 1.281  | 28.558 | 22.311 | 8  |
|                                             |                                                       | Gai            | VALIUM20                                       | BL34924     | OK371-Gal4/UAS- $\rightarrow$ Glut;UAS-RNAi <sup>DM801213/+</sup> | +        | 1.267  | 26.298 | 20.88  | 6  |
| 2204                                        | G protein $\alpha$ o subunit                          | Gao            | VALIUM10                                       | BL28010     | OK371-Gal4/UAS- $\rightarrow$ Glut;UAS-RNAi <sup>FD2384/+</sup>   | +        | 1.836  | 28.771 | 15.706 | 6  |
| 17759                                       | G protein $\alpha$ q subunit                          | Gaq            | VALIUM20                                       | BL36775     | OK371-Gal4/UAS- $\rightarrow$ Glut;UAS-RNAi <sup>FD2390/+</sup>   | +        | 1.451  | 25.427 | 18.046 | 8  |
| 2835                                        | G protein $\alpha$ s subunit                          | Gas            | VALIUM20                                       | BL50704     | OK371-Gal4/UAS- $\rightarrow$ Glut;UAS-RNAi <sup>DMC0310/+</sup>  | +        | 1.507  | 23.155 | 16.079 | 8  |
| 12232                                       | G protein $\alpha$ f subunit                          | Gaf            | VALIUM10                                       | BL25930     | OK371-Gal4/UAS- $\rightarrow$ Glut;UAS-RNAi <sup>FD1950/+</sup>   | +        | 1.449  | 24.264 | 17.106 | 8  |
| 8770                                        | G protein $\beta$ -subunit 76C                        | G $\beta$ -76C | VALIUM10                                       | BL28507     | OK371-Gal4/UAS- $\rightarrow$ Glut;UAS-RNAi <sup>FD3127/+</sup>   | +        | 1.074  | 23.588 | 22.979 | 8  |
| 8261                                        | G protein $\gamma$ 1                                  | Gyl            | VALIUM10                                       | BL25934     | OK371-Gal4/UAS- $\rightarrow$ Glut;UAS-RNAi <sup>FD1954/+</sup>   | +        | 1.342  | 26.501 | 19.724 | 7  |

**Supplementary Table 2: Absolute values for normalized data and additional statistical details.** The figure and panel, genotype, and conditions are noted. Average values (with standard error values noted in parentheses) are shown for all data. For electrophysiological experiments, passive membrane properties (input resistance, leak current), mEPSC, EPSC, quantal content (QC), data samples (n), and statistical significance tests and values are shown.

| Figure      | Label                                           | Genotype                                                                    | [Ca <sup>2+</sup> ]<br>mM | vGlut-<br>OE | mEPSC<br>amplitude<br>(nA) | EPSC<br>amplitude<br>(nA) | QC                   | mEPSC<br>frequency<br>(Hz) | R <sub>input</sub><br>(MΩ) | leak<br>current<br>(nA) | n  | P Value<br>(significance:<br>mEPSC amp,<br>EPSC, QC) |
|-------------|-------------------------------------------------|-----------------------------------------------------------------------------|---------------------------|--------------|----------------------------|---------------------------|----------------------|----------------------------|----------------------------|-------------------------|----|------------------------------------------------------|
| Figure 2D-G | wild type                                       | <i>w<sup>1118</sup></i>                                                     | 0.4                       | -            | 0.438<br>(±0.012)          | 41.285<br>(±3.239)        | 105.890<br>(±8.018)  | 2.360<br>(±0.464)          | 6.000<br>(±0.588)          | -1.693<br>(±0.275)      | 18 | -                                                    |
| Figure 2D-G | vGlut-OE                                        | <i>w;OK371-Gal4/UAS-vGlut</i>                                               | 0.4                       | +            | 0.597<br>(±0.022)          | 44.085<br>(±2.523)        | 71.950<br>(±4.248)   | 1.886<br>(±0.272)          | 7.333<br>(±0.267)          | -2.695<br>(±0.230)      | 19 | <0.0001 (****),<br>0.4971 (ns),<br>0.0006 (****)     |
| Figure 2D-G | <i>GluClα<sup>1</sup></i>                       | <i>w;GluClα<sup>1</sup></i>                                                 | 0.4                       | -            | 0.487<br>(±0.022)          | 40.724<br>(±3.653)        | 86.422<br>(±9.351)   | 2.283<br>(±0.187)          | 6.800<br>(±0.693)          | -1.718<br>(±0.301)      | 13 | -                                                    |
| Figure 2D-G | <i>GluClα<sup>1</sup></i><br>+ vGlut-OE         | <i>w;OK371-Gal4/UAS-<br/>vGlut;GluClα<sup>1</sup></i>                       | 0.4                       | +            | 0.655<br>(±0.019)          | 66.203<br>(±4.759)        | 101.606<br>(±7.492)  | 2.542<br>(±0.201)          | 8.000<br>(±0.803)          | -2.481<br>(±0.264)      | 10 | <0.0001 (****),<br>0.0002 (****),<br>0.3832 (ns)     |
| Figure 2G   | <i>GluClα<sup>1</sup>/Df</i>                    | <i>w;GluClα<sup>1</sup>/Df(BSC809)</i>                                      | 0.4                       | -            | 0.442<br>(±0.011)          | 39.178<br>(±3.667)        | 90.339<br>(±9.912)   | 2.252<br>(±0.144)          | 8.545<br>(±0.731)          | -2.848<br>(±0.424)      | 11 | -                                                    |
| Figure 2G   | <i>GluClα<sup>1</sup>/Df</i><br>+ vGlut-OE      | <i>w;OK371-Gal4/UAS-<br/>vGlut;GluClα<sup>1</sup>/Df<sup>BSC809</sup></i>   | 0.4                       | +            | 0.572<br>(±0.015)          | 53.939<br>(±2.349)        | 94.876<br>(±4.848)   | 3.003<br>(±0.722)          | 7.900<br>(±0.314)          | -2.175<br>(±0.389)      | 10 | <0.0001 (****),<br>0.0037 (***),<br>0.6949 (ns)      |
| Figure 2G   | <i>GluClα<sup>8/8</sup>/Df</i>                  | <i>w;GluClα<sup>8/8</sup>/Df<sup>BSC809</sup></i>                           | 0.4                       | -            | 0.435<br>(±0.022)          | 42.784<br>(±3.918)        | 101.577<br>(±10.776) | 2.252<br>(±0.144)          | 8.235<br>(±0.683)          | -2.133<br>(±0.316)      | 13 | -                                                    |
| Figure 2G   | <i>GluClα<sup>8/8</sup>/Df</i><br>+ vGlut-OE    | <i>w;OK371-Gal4/UAS-<br/>vGlut;GluClα<sup>8/8</sup>/Df<sup>BSC809</sup></i> | 0.4                       | +            | 0.562<br>(±0.013)          | 61.426<br>(±3.609)        | 108.893<br>(±4.497)  | 3.276<br>(±0.445)          | 10.429<br>(±0.922)         | -2.089<br>(±0.281)      | 7  | 0.0007 (***),<br>0.0060 (***),<br>0.6364 (ns)        |
| Figure 2G   | <i>GluClα<sup>FipStop.D</sup></i>               | <i>w;GluClα<sup>FipStop.D</sup></i>                                         | 0.4                       | -            | 0.443<br>(±0.023)          | 43.473<br>(±0.821)        | 99.736<br>(±3.821)   | 3.473<br>(±0.443)          | 10.000<br>(±0.724)         | -2.427<br>(±0.453)      | 10 | -                                                    |
| Figure 2G   | <i>GluClα<sup>FipStop.D</sup></i><br>+ vGlut-OE | <i>w;OK371-Gal4/UAS-<br/>vGlut;GluClα<sup>FipStop.D</sup></i>               | 0.4                       | +            | 0.628<br>(±0.026)          | 56.778<br>(±1.840)        | 91.297<br>(±3.074)   | 3.441<br>(±0.424)          | 10.024<br>(±0.759)         | -2.057<br>(±0.244)      | 11 | <0.0001 (****),<br><0.0001 (****),<br>0.0989 (ns)    |
| Figure 2    | wild type                                       | <i>w<sup>1118</sup></i>                                                     | 0.4                       | -            | 0.442<br>(±0.015)          | 42.938<br>(±3.354)        | 98.336<br>(±9.300)   | 3.315<br>(±0.386)          | 8.500<br>(±0.627)          | -2.642<br>(±0.477)      | 8  | -                                                    |
| Figure 2    | <i>Df/+</i>                                     | <i>w;Df(BSC809)/+</i>                                                       | 0.4                       | -            | 0.438<br>(±0.028)          | 43.012<br>(±4.406)        | 100.790<br>(±13.215) | 2.142<br>(±0.415)          | 7.167<br>(±0.601)          | -1.097<br>(±)           | 6  | 0.9306 (ns),<br>0.9893 (ns),<br>0.8913 (ns)          |
| Figure 2    | <i>GluClα<sup>1</sup>/+</i>                     | <i>w;GluClα<sup>1</sup>/+</i>                                               | 0.4                       | -            | 0.437<br>(±0.013)          | 39.002<br>(±2.721)        | 89.218<br>(±6.010)   | 3.145<br>(±0.217)          | 7.000<br>(±0.535)          | -1.591<br>(±0.329)      | 7  | 0.7993 (ns),<br>0.3877 (ns),<br>0.4401 (ns)          |
| Figure 2    | <i>GluClα<sup>8/8</sup>/+</i>                   | <i>w;GluClα<sup>8/8</sup>/+</i>                                             | 0.4                       | -            | 0.482<br>(±0.017)          | 40.665<br>(±3.665)        | 84.513<br>(±7.166)   | 4.000<br>(±0.574)          | 7.667<br>(±0.760)          | -3.168<br>(±0.185)      | 6  | 0.0980 (ns),<br>0.6582 (ns),<br>0.2889 (ns)          |
| Figure 2    | <i>GluClα<sup>FipStop.D</sup>/+</i>             | <i>w;GluClα<sup>FipStop.D</sup>/+</i>                                       | 0.4                       | -            | 0.474<br>(±0.016)          | 42.062<br>(±5.336)        | 90.468<br>(±13.621)  | 3.381<br>(±0.309)          | 8.286<br>(±0.837)          | -2.049<br>(±0.160)      | 7  | 0.1624 (ns),<br>0.8886 (ns),<br>0.6340 (ns)          |
| Figure 3B,C | wild type                                       | <i>w<sup>1118</sup></i>                                                     | 0.4                       | -            | 0.417<br>(±0.009)          | 40.901<br>(±3.381)        | 98.024<br>(±7.943)   | 3.681<br>(±0.215)          | 7.667<br>(±0.607)          | -2.205<br>(±0.181)      | 12 | -                                                    |
| Figure 3B,C | vGlut-OE                                        | <i>w;OK371-Gal4/UAS-vGlut</i>                                               | 0.4                       | +            | 0.605<br>(±0.023)          | 36.980<br>(±1.541)        | 61.801<br>(±3.001)   | 2.892<br>(±0.278)          | 7.923<br>(±0.665)          | -1.875<br>(±0.214)      | 13 | <0.0001 (****),<br>0.2897 (ns), 0.0002<br>(****)     |
| Figure 3B,C | pre > <i>GluClα</i><br>RNAi                     | <i>w;OK371-Gal4/UAS-GluClα<br/>RNAi;UAS-Dcr2/+</i>                          | 0.4                       | -            | 0.404<br>(±0.008)          | 43.862<br>(±1.712)        | 109.718<br>(±5.309)  | 1.705<br>(±0.183)          | 8.813<br>(±0.736)          | -2.743<br>(±0.326)      | 16 | -                                                    |
| Figure 3B,C | pre > <i>GluClα</i><br>RNAi<br>+ vGlut-OE       | <i>w;OK371-Gal4/UAS-<br/>vGlut,UAS-GluClα<br/>RNAi;UAS-Dcr2/+</i>           | 0.4                       | +            | 0.567<br>(±0.011)          | 69.073<br>(±1.756)        | 122.648<br>(±3.669)  | 2.262<br>(±0.223)          | 8.250<br>(±0.491)          | -1.687<br>(±0.219)      | 20 | <0.0001 (****),<br><0.0001 (****),<br>0.0544 (ns)    |



| Figure      | Label                               | Genotype                           | [Ca <sup>2+</sup> ]<br>mM | extracellular<br>Cl <sup>-</sup> | mEPSC<br>amplitude<br>(nA) | EPSC<br>amplitude<br>(nA) | QC                   | mEPSC<br>frequency<br>(Hz) | input<br>resistance<br>(MΩ) | leak<br>current<br>(nA) | n  | P Value<br>(significance:<br>mEPSC amp,<br>EPSC, QC) |
|-------------|-------------------------------------|------------------------------------|---------------------------|----------------------------------|----------------------------|---------------------------|----------------------|----------------------------|-----------------------------|-------------------------|----|------------------------------------------------------|
| Figure 4A-E | wild type                           | <i>w<sup>1118</sup></i>            | 0.4                       | +                                | 0.448<br>(±0.010)          | 45.194<br>(±3.169)        | 101.676<br>(±7.407)  | 3.199<br>(±0.277)          | 8.200<br>(±0.460)           | -2.063<br>(±0.344)      | 15 | -                                                    |
| Figure 4A-E | vGlut-OE                            | <i>w;OK371-<br/>Gal4/UAS-vGlut</i> | 0.4                       | +                                | 0.572<br>(±0.026)          | 40.122<br>(±1.442)        | 72.018<br>(±3.927)   | 2.516<br>(±0.350)          | 6.941<br>(±0.433)           | -2.386<br>(±0.205)      | 17 | 0.0002 (***),<br>0.140 (ns), 0.0009<br>(***)         |
| Figure 4A-E | wild type<br>(Cl <sup>-</sup> free) | <i>w<sup>1118</sup></i>            | 0.4                       | -                                | 0.409<br>(±0.009)          | 40.744<br>(±4.275)        | 101.324<br>(±12.022) | 3.587<br>(±0.285)          | 8.250<br>(±0.708)           | -4.518<br>(±0.406)      | 12 | -                                                    |
| Figure 4A-E | vGlut-OE<br>(Cl <sup>-</sup> free)  | <i>w;OK371-<br/>Gal4/UAS-vGlut</i> | 0.4                       | -                                | 0.493<br>(±0.015)          | 57.275<br>(±3.984)        | 117.675<br>(±8.737)  | 2.207<br>(±0.381)          | 6.071<br>(±0.425)           | -3.601<br>(±0.295)      | 13 | 0.0001 (***),<br>0.0094 (**),<br>0.2773 (ns)         |

| Figure      | Label                 | Genotype                                  | [Ca <sup>2+</sup> ]<br>mM | mEPSC<br>amplitude<br>(nA) | EPSC<br>amplitude<br>(nA) | QC                  | mEPSC<br>frequency<br>(Hz) | input<br>resistance<br>(MΩ) | leak<br>current<br>(nA) | n  | P Value<br>(significance:<br>mEPSC amp,<br>EPSC, QC) |
|-------------|-----------------------|-------------------------------------------|---------------------------|----------------------------|---------------------------|---------------------|----------------------------|-----------------------------|-------------------------|----|------------------------------------------------------|
| Figure 5B-D | wild type             | <i>w<sup>1118</sup></i>                   | 0.4                       | 0.475<br>(±0.014)          | 42.845<br>(±1.785)        | 91.322<br>(±4.619)  | 3.571<br>(±0.403)          | 7.000<br>(±0.516)           | -2.107<br>(±0.320)      | 13 | -                                                    |
| Figure 5B-D | pre > GluClα          | <i>w;OK371-Gal4/UAS-<br/>GluClα</i>       | 0.4                       | 0.468<br>(±0.015)          | 29.983<br>(±1.783)        | 66.873<br>(±4.994)  | 2.527<br>(±0.183)          | 7.833<br>(±0.442)           | -1.853<br>(±0.245)      | 26 | 0.7632 (ns),<br><0.0001 (****),<br>0.0017 (**)       |
| Figure 5    | wild type             | <i>w<sup>1118</sup></i>                   | 0.4                       | 0.474<br>(±0.017)          | 48.819<br>(±2.332)        | 103.590<br>(±4.764) | 3.041<br>(±0.306)          | 8.333<br>(±0.699)           | -2.381<br>(±0.369)      | 13 | -                                                    |
| Figure 5    | pre ><br>GluClα::smFP | <i>w;OK371-Gal4/UAS-<br/>GluClα::smFP</i> | 0.4                       | 0.437<br>(±0.021)          | 30.803<br>(±3.245)        | 75.740<br>(±9.234)  | 3.346<br>(±0.182)          | 10.391<br>(±1.494)          | -2.366<br>(±0.223)      | 21 | 0.2190 (ns),<br>0.0004 (****),<br>0.0314 (*)         |

| Figure      | Label                     | Genotype                                | [Ca <sup>2+</sup> ]<br>mM | τ <sub>rise</sub><br>(% baseline<br>-ivermectin) | τ <sub>decay</sub><br>(% baseline<br>-ivermectin) | mEPSC area<br>(% baseline<br>-ivermectin) | QC<br>(% baseline<br>-ivermectin) | leak current<br>(nA) | n | P value (τ <sub>rise</sub> , τ <sub>decay</sub> , mEPSC area, QC<br>compare to baseline - ivermectin) |
|-------------|---------------------------|-----------------------------------------|---------------------------|--------------------------------------------------|---------------------------------------------------|-------------------------------------------|-----------------------------------|----------------------|---|-------------------------------------------------------------------------------------------------------|
| Figure 6B-E | wild type                 | <i>w<sup>1118</sup></i>                 | 0.4                       | 101.725<br>(±2.939)                              | 72.724<br>(±3.855)                                | 95.952<br>(±6.256)                        | 75.591<br>(±3.413)                | -2.782<br>(±0.699)   | 5 | 0.0685 (ns), 0.0002 (***),<br>0.7956 (ns), 0.0032 (**)                                                |
| Figure 6B-E | <i>GluClα<sup>1</sup></i> | <i>w;GluClα<sup>1</sup></i>             | 0.4                       | 98.973<br>(±1.626)                               | 96.017<br>(±3.417)                                | 96.651<br>(±7.1679)                       | 97.002<br>(±5.589)                | -2.077<br>(±0.844)   | 5 | 0.4140 (ns), 0.3002 (ns),<br>0.6466 (ns), 0.6888 (ns)                                                 |
| Figure 6B-E | vGlut-OE                  | <i>w;OK371-<br/>Gal4/UAS-<br/>vGlut</i> | 0.4                       | 97.867<br>(±1.671)                               | 84.090<br>(±2.445)                                | 97.832<br>(±8.820)                        | 63.068<br>(±5.987)                | -1.738<br>(±0.965)   | 7 | 0.2109 (ns), 0.0011 (**),<br>0.8846 (ns), 0.0003 (****)                                               |

| Figure    | Label                   | Genotype                                             | Triton | mean intensity (AU, Arbitrary Unit) |                      |                       | n  | P Value (significance: mean<br>intensity)                                   |
|-----------|-------------------------|------------------------------------------------------|--------|-------------------------------------|----------------------|-----------------------|----|-----------------------------------------------------------------------------|
|           |                         |                                                      |        | vGlut                               | GluClα               | Syt                   |    |                                                                             |
| Figure 7B | GluClα-OE               | <i>w;OK371-Gal4/ UAS-GluClα::smFP</i>                | +      | 713.187<br>(±26.36)                 | 509.365<br>(±28.903) | 1114.043<br>(±48.263) | 24 | -                                                                           |
| Figure 7B | GluClα-OE +<br>vGlut-OE | <i>w;OK371-Gal4/UAS-vGlut, UAS-<br/>GluClα::smFP</i> | +      | 1232.932<br>(±65.171)               | 651.480<br>(±37.405) | 713.187<br>(±97.701)  | 22 | <0.0001 (****),<br>0.0136 (*),<br>0.1284 (ns)                               |
| Figure 7D | GluClα-OE               | <i>w;OK371-Gal4/ UAS-GluClα::smFP</i>                | -      | 52.057<br>(±3.575)                  | 97.654<br>(±6.648)   | 86.882<br>(±5.865)    | 16 | <0.0001 (****),<br><0.0001 (****),<br><0.0001 (****)<br>Compare to - Triton |
| Figure 7D | GluClα-OE +<br>vGlut-OE | <i>w;OK371-Gal4/UAS-vGlut, UAS-<br/>GluClα::smFP</i> | -      | 84.760<br>(±8.399)                  | 98.098<br>(±6.504)   | 77.703<br>(±5.584)    | 16 | <0.0001 (****),<br><0.0001 (****),<br><0.0001 (****)<br>Compare to - Triton |

| Figure    | Label                                  | Genotype                                                                   | Triton | high K <sup>+</sup> | temp | mean intensity (AU, Arbitrary Unit) |                         |                         | n  | P Value (significance: mean intensity) |
|-----------|----------------------------------------|----------------------------------------------------------------------------|--------|---------------------|------|-------------------------------------|-------------------------|-------------------------|----|----------------------------------------|
|           |                                        |                                                                            |        |                     |      | vGluT                               | GluCl $\alpha$          | Syt                     |    |                                        |
| Figure 7F | <i>shi:GluCl<math>\alpha</math>-OE</i> | <i>shi<sup>ts1</sup>/y; OK371-Gal4/ UAS-GluCl<math>\alpha</math>::smFP</i> | -      | -                   | RT   | 98.267 ( $\pm$ 13.221)              | 190.432 ( $\pm$ 28.278) | 144.144 ( $\pm$ 29.954) | 11 | -                                      |
| Figure 7F | <i>shi:GluCl<math>\alpha</math>-OE</i> | <i>shi<sup>ts1</sup>/y; OK371-Gal4/ UAS-GluCl<math>\alpha</math>::smFP</i> | -      | +                   | 34°C | 86.303 ( $\pm$ 9.942)               | 348.23 ( $\pm$ 31.109)  | 136.37 ( $\pm$ 17.850)  | 13 | 0.1071 (ns), 0.0018 (**), 0.8272 (ns)  |

| Figure      | Label                            | Genotype                      | [Ca <sup>2+</sup> ]<br>mM | extracellular Cl <sup>-</sup> | $\Delta R/R$         | $\tau_{decay}$ (s)   | rise time (ms)        | n  | P value (AR/ R, $\tau_{decay}$ (s), and rise time compare to wild type control) |
|-------------|----------------------------------|-------------------------------|---------------------------|-------------------------------|----------------------|----------------------|-----------------------|----|---------------------------------------------------------------------------------|
| Figure 8C-D | wild type                        | <i>w<sup>1118</sup></i>       | 1.0                       | +                             | 0.617 ( $\pm$ 0.043) | 0.206 ( $\pm$ 0.011) | 13.202 ( $\pm$ 0.954) | 12 | -                                                                               |
| Figure 8C-D | vGluT-OE                         | <i>w;OK371-Gal4/UAS-vGluT</i> | 1.0                       | +                             | 0.298 ( $\pm$ 0.019) | 0.214 ( $\pm$ 0.009) | 12.752 ( $\pm$ 0.485) | 12 | <0.0001 (****), 0.6224 (ns), 0.6783 (ns)                                        |
| Figure 8E-F | wild type (Cl <sup>-</sup> free) | <i>w<sup>1118</sup></i>       | 1.0                       | -                             | 0.592 ( $\pm$ 0.022) | 0.215 ( $\pm$ 0.008) | 12.739 ( $\pm$ 0.571) | 12 | -                                                                               |
| Figure 8E-F | vGluT-OE (Cl <sup>-</sup> free)  | <i>w;OK371-Gal4/UAS-vGluT</i> | 1.0                       | -                             | 0.615 ( $\pm$ 0.040) | 0.206 ( $\pm$ 0.009) | 13.422 ( $\pm$ 0.669) | 12 | 0.6192 (ns), 0.4422 (ns), 0.4456 (ns)                                           |

| Figure                   | Label           | Genotype                                | [Ca <sup>2+</sup> ]<br>mM | vGluT-OE | mEPSP amplitude (mV) | EPSP amplitude (mV)   | QC                    | mEPSP frequency (Hz) | input resistance (M $\Omega$ ) | resting potential (mV) | n  | P Value (significance: mEPSC amp, EPSC, QC) |
|--------------------------|-----------------|-----------------------------------------|---------------------------|----------|----------------------|-----------------------|-----------------------|----------------------|--------------------------------|------------------------|----|---------------------------------------------|
| Supplemental Figure 1B,C | pertussis toxin | <i>w;OK371-Gal4/+;UAS-PTX/+</i>         | 0.3                       | -        | 0.872 ( $\pm$ 0.088) | 17.883 ( $\pm$ 2.105) | 19.505 ( $\pm$ 1.305) | 0.872 ( $\pm$ 0.088) | 8.000 ( $\pm$ 0.405)           | -64.069 ( $\pm$ 2.449) | 11 | -                                           |
| Supplemental Figure 1B,C | pertussis toxin | <i>w;OK371-Gal4/UAS-vGluT;UAS-PTX/+</i> | 0.3                       | +        | 1.415 ( $\pm$ 0.051) | 15.636 ( $\pm$ 1.827) | 11.046 ( $\pm$ 1.262) | 2.563 ( $\pm$ 0.264) | 7.889 ( $\pm$ 0.716)           | -63.614 ( $\pm$ 0.836) | 9  | <0.0001 (****), 0.4420 (ns), 0.0002 (****)  |

| Figure                 | Label                                          | Genotype                                                          | bouton #/NMJ           | n  | P Value (significance: mEPSC amp, EPSC, QC) |
|------------------------|------------------------------------------------|-------------------------------------------------------------------|------------------------|----|---------------------------------------------|
| Supplemental Figure 3B | wild type                                      | <i>w<sup>1118</sup></i>                                           | 124.167 ( $\pm$ 7.813) | 12 | -                                           |
| Supplemental Figure 3B | <i>GluCl<math>\alpha</math><sup>1</sup></i>    | <i>w;GluCl<math>\alpha</math><sup>1</sup></i>                     | 106.750 ( $\pm$ 6.609) | 12 | 0.2958 (ns)                                 |
| Supplemental Figure 3B | <i>GluCl<math>\alpha</math><sup>1</sup>/Df</i> | <i>w;GluCl<math>\alpha</math><sup>1</sup>/DF<sup>BSC809</sup></i> | 119.833 ( $\pm$ 9.634) | 12 | 0.9246 (ns)                                 |

| Figure                 | Label                                                  | Genotype                                                           | [Ca <sup>2+</sup> ]<br>mM | QC                    | Ca <sup>2+</sup> coop slope    | input resistance (M $\Omega$ ) | leak current (nA)     | n  | P Value (significance: slope) |
|------------------------|--------------------------------------------------------|--------------------------------------------------------------------|---------------------------|-----------------------|--------------------------------|--------------------------------|-----------------------|----|-------------------------------|
| Supplemental Figure 4A | wild type                                              | <i>w<sup>1118</sup></i>                                            | 0.3                       | 49.185 ( $\pm$ 3.624) | 1.980 (R <sup>2</sup> : 0.745) | 8.000 ( $\pm$ 0.577)           | -3.411 ( $\pm$ 0.652) | 13 | -                             |
| Supplemental Figure 4A | vGluT-OE                                               | <i>w;OK371-Gal4/UAS-vGluT</i>                                      | 0.3                       | 37.929 ( $\pm$ 3.625) | 2.051 (R <sup>2</sup> : 0.692) | 11.333 ( $\pm$ 1.054)          | -2.997 ( $\pm$ 0.353) | 9  | 0.8704 (ns)                   |
| Supplemental Figure 4A | <i>GluCl<math>\alpha</math><sup>1</sup></i>            | <i>w;GluCl<math>\alpha</math><sup>1</sup></i>                      | 0.3                       | 57.262 ( $\pm$ 5.735) | 1.910 (R <sup>2</sup> : 0.868) | 5.571 ( $\pm$ 0.481)           | -2.205 ( $\pm$ 0.224) | 7  | -                             |
| Supplemental Figure 4A | <i>GluCl<math>\alpha</math><sup>1</sup> + vGluT-OE</i> | <i>w;OK371-Gal4/UAS-vGluT;GluCl<math>\alpha</math><sup>1</sup></i> | 0.3                       | 57.337 ( $\pm$ 3.847) | 1.585 (R <sup>2</sup> : 0.744) | 6.500 ( $\pm$ 0.671)           | -1.517 ( $\pm$ 0.409) | 6  | 0.2755 (ns)                   |

|                        |                                      |                                                  |     |                      |   |                 |                 |    |   |
|------------------------|--------------------------------------|--------------------------------------------------|-----|----------------------|---|-----------------|-----------------|----|---|
| Supplemental Figure 4A | wild type                            | <i>w<sup>1118</sup></i>                          | 0.4 | 108.049<br>(±11.798) | - | 6.500 (±0.535)  | -3.266 (±0.296) | 8  | - |
| Supplemental Figure 4A | vGlut-OE                             | <i>w;OK371-Gal4/UAS-vGlut</i>                    | 0.4 | 77.826 (±5.821)      | - | 7.333 (±0.422)  | -3.691 (±0.433) | 6  | - |
| Supplemental Figure 4A | <i>GluCla<sup>1</sup></i>            | <i>w;GluCla<sup>1</sup></i>                      | 0.4 | 95.295 (±3.25)       | - | 5.167 (±0.307)  | -2.149 (±0.189) | 6  | - |
| Supplemental Figure 4A | <i>GluCla<sup>1</sup></i> + vGlut-OE | <i>w;OK371-Gal4/UAS-vGlut;GluCla<sup>1</sup></i> | 0.4 | 107.684<br>(±5.161)  | - | 7.182 (±0.724)  | -1.327 (±0.264) | 11 | - |
| Supplemental Figure 4A | wild type                            | <i>w<sup>1118</sup></i>                          | 0.5 | 148.632<br>(±8.679)  | - | 7.364 (±0.704)  | -2.033 (±0.265) | 11 | - |
| Supplemental Figure 4A | vGlut-OE                             | <i>w;OK371-Gal4/UAS-vGlut</i>                    | 0.5 | 114.442<br>(±9.851)  | - | 10.636 (±0.917) | -2.218 (±0.302) | 11 | - |
| Supplemental Figure 4A | <i>GluCla<sup>1</sup></i>            | <i>w;GluCla<sup>1</sup></i>                      | 0.5 | 149.193<br>(±6.942)  | - | 11.556 (±1.180) | -1.474 (±0.136) | 9  | - |
| Supplemental Figure 4A | <i>GluCla<sup>1</sup></i> + vGlut-OE | <i>w;OK371-Gal4/UAS-vGlut;GluCla<sup>1</sup></i> | 0.5 | 142.385<br>(±7.990)  | - | 11.222 (±0.795) | -2.091 (±0.389) | 9  | - |

| Figure                 | Label                                | Genotype                                         | [Ca <sup>2+</sup> ]<br>mM | failure rate (%)   | input resistance<br>(MΩ) | resting potential<br>(mV) | n  | P Value<br>(significance:<br>failure rate) |
|------------------------|--------------------------------------|--------------------------------------------------|---------------------------|--------------------|--------------------------|---------------------------|----|--------------------------------------------|
| Supplemental Figure 4B | wild type                            | <i>w<sup>1118</sup></i>                          | 0.1                       | 55.556<br>(±8.352) | 10.778<br>(±0.830)       | -66.645 (±0.606)          | 9  | -                                          |
| Supplemental Figure 4B | vGlut-OE                             | <i>w;OK371-Gal4/UAS-vGlut</i>                    | 0.1                       | 82.000<br>(±3.220) | 14.875<br>(±0.676)       | -67.221 (±1.425)          | 16 | 0.0019 (**)                                |
| Supplemental Figure 4B | <i>GluCla<sup>1</sup></i>            | <i>w;GluCla<sup>1</sup></i>                      | 0.1                       | 61.000<br>(±4.775) | 10.571<br>(±0.510)       | -67.411 (±1.173)          | 14 | 0.5486 (ns)                                |
| Supplemental Figure 4B | <i>GluCla<sup>1</sup></i> + vGlut-OE | <i>w;OK371-Gal4/UAS-vGlut;GluCla<sup>1</sup></i> | 0.1                       | 63.800<br>(±3.608) | 10.200<br>(±0.573)       | -67.294 (±1.592)          | 10 | 0.3604 (ns)                                |

| Figure                 | Label                                | Genotype                                         | [Ca <sup>2+</sup> ]<br>mM | paired-pulse rate (%) | input resistance<br>(MΩ) | leak current (nA)  | n  | P Value<br>(significance:<br>paired-pulse rate) |
|------------------------|--------------------------------------|--------------------------------------------------|---------------------------|-----------------------|--------------------------|--------------------|----|-------------------------------------------------|
| Supplemental Figure 4D | wild type                            | <i>w<sup>1118</sup></i>                          | 0.3                       | 180.462<br>(±5.188)   | 7.250<br>(±0.491)        | -4.913<br>(±0.791) | 8  | -                                               |
| Supplemental Figure 4D | vGlut-OE                             | <i>w;OK371-Gal4/UAS-vGlut</i>                    | 0.3                       | 227.726<br>(±13.939)  | 11.200<br>(±0.952)       | -3.462<br>(±0.398) | 10 | 0.0106 (*)                                      |
| Supplemental Figure 4D | <i>GluCla<sup>1</sup></i>            | <i>w;GluCla<sup>1</sup></i>                      | 0.3                       | 181.601<br>(±12.461)  | 7.111<br>(±1.006)        | -2.214<br>(±1.486) | 9  | 0.9427 (ns)                                     |
| Supplemental Figure 4D | <i>GluCla<sup>1</sup></i> + vGlut-OE | <i>w;OK371-Gal4/UAS-vGlut;GluCla<sup>1</sup></i> | 0.3                       | 174.701<br>(±4.814)   | 6.500<br>(±0.671)        | -1.790<br>(±0.446) | 6  | 0.4463 (ns)                                     |
| Supplemental Figure 4F | wild type                            | <i>w<sup>1118</sup></i>                          | 1.8                       | 82.348<br>(±2.590)    | 9.091<br>(±0.879)        | -0.011<br>(±0.002) | 11 | -                                               |
| Supplemental Figure 4F | vGlut-OE                             | <i>w;OK371-Gal4/UAS-vGlut</i>                    | 1.8                       | 99.042<br>(±5.676)    | 10.143<br>(±1.100)       | 0.001<br>(±0.0004) | 7  | 0.0081 (**)                                     |
| Supplemental Figure 4F | <i>GluCla<sup>1</sup></i>            | <i>w;GluCla<sup>1</sup></i>                      | 1.8                       | 85.383<br>(±1.844)    | 11.100<br>(±0.781)       | -0.013<br>(±0.003) | 10 | 0.3601 (ns)                                     |
| Supplemental Figure 4F | <i>GluCla<sup>1</sup></i> + vGlut-OE | <i>w;OK371-Gal4/UAS-vGlut;GluCla<sup>1</sup></i> | 1.8                       | 82.375<br>(±2.890)    | 13.083<br>(±0.821)       | -0.007<br>(±0.001) | 12 | 0.9947 (ns)                                     |

| Figure                    | Label                                            | Genotype                                                      | [Ca <sup>2+</sup> ]<br>mM | PhTx | mEPSC<br>amplitude<br>(nA) | EPSC<br>amplitude<br>(nA) | QC                   | mEPSP<br>frequency<br>(Hz) | input<br>resistance<br>(MΩ) | leak<br>current<br>(nA) | n  | P Value<br>(significance:<br>mEPSC amp,<br>EPSC, QC) |
|---------------------------|--------------------------------------------------|---------------------------------------------------------------|---------------------------|------|----------------------------|---------------------------|----------------------|----------------------------|-----------------------------|-------------------------|----|------------------------------------------------------|
| Supplemental<br>Figure 5B | wild type                                        | <i>w<sup>J118</sup></i>                                       | 0.4                       | -    | 0.439<br>(±0.016)          | 42.514<br>(±3.658)        | 96.730<br>(±7.981)   | 3.415<br>(±0.364)          | 9.909<br>(±1.187)           | -2.346<br>(±0.419)      | 11 | -                                                    |
| Supplemental<br>Figure 5B | wild type                                        | <i>w<sup>J118</sup></i>                                       | 0.4                       | +    | 0.281<br>(±0.012)          | 45.212<br>(±2.469)        | 164.033<br>(±12.230) | 2.254<br>(±0.211)          | 11.556<br>(±0.801)          | -2.079<br>(±0.251)      | 9  | <0.0001 (****),<br>0.5674 (ns),<br>0.0002 (****)     |
| Supplemental<br>Figure 5B | <i>GluRIIA</i>                                   | <i>w;GluRIIA<sup>SP16</sup></i>                               | 0.4                       | -    | 0.213<br>(±0.005)          | 38.843<br>(±2.091)        | 182.379<br>(±8.581)  | 0.787<br>(±0.096)          | 7.167<br>(±0.307)           | -1.435<br>(±0.206)      | 6  | <0.0001 (****),<br>0.4948 (ns),<br><0.0001 (****)    |
| Supplemental<br>Figure 5B | <i>GluCla<sup>1</sup></i>                        | <i>w;GluCla<sup>1</sup></i>                                   | 0.4                       | -    | 0.419<br>(±0.011)          | 47.805<br>(±2.750)        | 115.077<br>(±7.238)  | 3.014<br>(±0.391)          | 9.250<br>(±0.351)           | -2.336<br>(±0.282)      | 12 | -                                                    |
| Supplemental<br>Figure 5B | <i>GluCla<sup>1</sup></i>                        | <i>w;GluCla<sup>1</sup></i>                                   | 0.4                       | +    | 0.263<br>(±0.014)          | 46.114<br>(±3.462)        | 175.624<br>(±9.821)  | 2.304<br>(±0.191)          | 9.500<br>(±0.945)           | -3.156<br>(±0.771)      | 8  | <0.0001 (****),<br>0.7049 (ns),<br><0.0001 (****)    |
| Supplemental<br>Figure 5B | <i>GluCla<sup>1</sup></i><br>+<br><i>GluRIIA</i> | <i>w;GluRIIA<sup>SP16</sup>;</i><br><i>GluCla<sup>1</sup></i> | 0.4                       | -    | 0.249<br>(±0.015)          | 42.035<br>(±1.627)        | 175.492<br>(±12.152) | 2.530<br>(±0.256)          | 11.539<br>(±0.938)          | -4.204<br>(±0.163)      | 13 | <0.0001 (****),<br>0.0787 (ns),<br>0.0004 (****)     |

**Supplementary Table 3: Key resources table.**

| REAGENT or RESOURCE                                         | SOURCE                      | IDENTIFIER                            |
|-------------------------------------------------------------|-----------------------------|---------------------------------------|
| <b>Chemicals, Peptides, and Recombinant Proteins</b>        |                             |                                       |
| Ivermectin                                                  | Sigma-Aldrich               | 18898-250MG, CAS: 70288-86-7          |
| Philanthotoxin 433                                          | Sigma-Aldrich               | CAS: 276684-27-6                      |
| Methyl sulfate sodium salt                                  | Sigma-Aldrich               | 318183-25G, CAS: 512-42-5             |
| Potassium methanesulfonate                                  | Sigma-Aldrich               | 83000-5G-F, CAS: 2386-56-3            |
| Magnesium nitrate hexahydrate                               | Sigma-Aldrich               | 63084-500G-F, CAS: 13446-18-9         |
| Calcium nitrate tetrahydrate                                | Sigma-Aldrich               | C1396-500G, CAS: 13477-34-4           |
| <b>Antibodies</b>                                           |                             |                                       |
| Mouse anti-Flag                                             | Sigma-Aldrich               | F1804                                 |
| Phalloidin-Alexa Fluor 647                                  | Thermo Fisher               | A22287                                |
| Guinea pig anti-vGlut                                       | (66)                        |                                       |
| Rabbit anti-Synaptotagmin                                   | (67)                        |                                       |
| Alexa Fluor 647 conjugated Goat anti-Horseradish Peroxidase | Jackson ImmunoResearch Labs | 123-605-021                           |
| Alexa Fluor 488-conjugated secondary antibodies             | Jackson ImmunoResearch Labs | 706-545-148, 715-545-150, 711-545-152 |
| Cy3-conjugated secondary antibodies                         | Jackson ImmunoResearch Labs | 706-165-148, 715-165-150, 711-165-152 |
| DyLight 405-conjugated secondary antibodies                 | Jackson ImmunoResearch Labs | 715-475-150, 706-475-148, 711-475-152 |
| <b>Experimental Models: <i>D. melanogaster</i> Strains</b>  |                             |                                       |
| OK371-Gal4                                                  | Mahr et al., 2006           |                                       |
| UAS-vGlut                                                   | (11)                        |                                       |
| UAS-GluCl $\alpha$ -RNAi p{KK109167}VIE-260B                | VDRC                        | v105754                               |
| UAS-CD4::tdeGFP                                             | Han et al., 2011            |                                       |
| UAS-Dcr2                                                    | BDSC                        | 24651                                 |
| GluCl $\alpha$ <sup>M102890</sup>                           | BDSC                        | 38025                                 |
| GluCl $\alpha$ <sup>g<sup>lc</sup></sup>                    | BDSC                        | 6353                                  |
| GluCl $\alpha$ <sup>FlpStop.D</sup>                         | (38)                        |                                       |
| GluCl $\alpha$ -T2A-Gal4                                    | (40)                        |                                       |
| mGluRA-T2A-Gal4                                             | (40)                        |                                       |
| NMDAR1-T2A-Gal4                                             | (40)                        |                                       |
| NMDAR2-T2A-Gal4                                             | (40)                        |                                       |
| Df(3R)BSC809                                                | BDSC                        | 27380                                 |
| UAS-GluCl $\alpha$                                          | This study                  |                                       |
| UAS-GluCl $\alpha$ ::smFP                                   | This study                  |                                       |
| shibire <sup>ts1</sup>                                      | BDSC                        | 7068                                  |
| UAS-Syt::mScar::GCaMP8f                                     | This study                  |                                       |
| <b>Software and Algorithms</b>                              |                             |                                       |
| NIS Elements software                                       | Nikon                       | 4.51.01                               |
| Axon pCLAMP Clampfit                                        | Molecular Devices           | 10.7                                  |
| MiniAnalysis                                                | Synaptosoft                 | 6.0.3                                 |
| Excel                                                       | Microsoft                   | 2016                                  |
| SigmaPlot                                                   | Systat                      | 14                                    |
| GraphPad Prism                                              | GraphPad                    | 8.0.1                                 |
